# Supplementary material for: Engineered glycoside hydrolases as fluorescent probes reveal the spatial distribution of the pectic polysaccharide rhamnogalacturonan II in plant cell walls
Source: Research Square preprint supplement (doi:10.21203/rs.3.rs-8001798/v1), 2025-11-23
Supplement: Supplementary file 1 [file 459cdeec8a8a5a49020cf80c.xlsx]

## Sheet: Light microscopy
Light microscopy reporting table
Please fill out each cell as directed, instructions in italics can be deleted as you complete each cell.
Hardware
Instrument and Camera	Imaging modality: Widefield epifluorescence microscopy; Microscope: Nikon Eclipse 80i; Camera: Color Nikon DS-Ri2
Resolution	Objectives: Plan Fluor 20x DIC N2 (NA 0.5), Plan Fluor 10x DIC L N1 (NA 0.3)
Filters and Light Sources	Light source: Nikon Intensilight C-HGFIE with Nikon C-HGFIE HG controller; Emission wavelength: TRITC (590-650 nm), FITC (515-555 nm), DAPI (435-485)
Quality Control
Is this the first report of the instrument? If yes, response to the below points is required and providing validation data is encouraged.
Yes	TRUE
No	FALSE
For all instruments, confirm that the following quality control processes were run:
n/a	Confirmed
TRUE	FALSE	Field homogeneity is assessed.
TRUE	FALSE	Illumination power stability is tested.
FALSE	TRUE	Stage drift is assessed.
TRUE	FALSE	Camera/detector noise is measured.
Methodology
Sample preparation and imaging	Please describe the imaging medium and temperature.
Fluorophores	Supplier	Excitation	Emission
Calcofluor White	Sigma Aldrich (18909)	340-380 nm	435-485 nm
Goat Anti-Mouse IgG H&L (Alexa Fluor® 594)	Abcam (ab150116)	590 nm	617 nm
mRuby3	GenBank: ATE88097.1	528-553 nm	590-650 nm
Acquisition
Software	NIS-Elements v 4.30
Enhancements	10X images	20X images
Exposure	400ms	400ms
Gain	1X	1X
Transmittance	1	1
Imaging parameters	10X images	20X images
Z-Stack Loop	37 (200µm)	39 (75µm)
Z-Step[µm]	5.6	2
Size	10X images	20X images
Width	463.8615 µm (1608)	234.8371 µm (1608)
Height	463.8615 µm (1608)	234.8371 µm (1608)
Resolution	3.4666 pixels per µm	6.8473 pixels per µm
Pixel Size	0.2885x0.2885 µm^2	0.1460x0.1460 µm^2
Image Processing
Software	(Fiji Is Just) ImageJ version 2.16.0/1.54p
	MATLAB R2024b
Workflow	Please describe the workflow sequentially and list any parameters changed from default. Explain processing analyses, such as the type of deconvolution, surface and volume rendering, gamma changes, filtering, thresholding and projection.
1	Convert raw .nd2 z-stacks into max intensity projections using Fiji and save as 8-bit .tif files
2	Using MATLAB, create an ImageDatastore from the image directory. Subfolders within the directory will be used as labels for subsequent analysis.
3	Create an ImageDatastore subset with images of your label of interest. These will be used to generate an average threshold.
4	Use the avgOtsu function to calculate an average from the global thresholds for all subset images.
4.1	Convert original max projections from uint8 (8-bit integers) to double-precision floating-point numbers to perform more accurate calculations.
4.2	Rescale pixel intensities to the range [0,1] according to the minimum and maximum values in the image. This enhances the consistency and performance of Otsu's thresholding algorithm.
4.3	Compute a global threshold using Otsu's method for every image in the ImageDatastore subset.
4.4	Average to generate one representative threshold that will be applied uniformly across all images to improve comparability.
5	Use the processDSNorm function to segment all images with the average threshold and extract intensity measurements.
5.1	Convert original images to double-precision and rescale as before.
5.2	Create a binary mask from the scaled image using the average threshold. This will be used to extract the number of pixels in the ROI.
5.3	Apply the mask to the original, double-precision image. This will be used to extract intensity measurements.
5.4	Store file name, threshold, area, total pixels, mean grey value, standard deviation, min and max grey value, integrated density, and raw integrated density. Combine into resultsTableNorm.
5.5	Save original, scaled, and masked image as .tif files.
6	[OPTIONAL] Merge results table with image acquisition information (Exposure, transmittance, gain, etc..)
